# Supplementary material for: A π-extended benzothiadiazole derivative for a high-efficiency TADF-sensitized fluorescent organic light-emitting diode
Source: Royal Society of Chemistry journal article supplement (doi:10.1039/d2cc05615a), 2022-01-01
Supplement: d2cc05615a1.pdf [file d2cc05615a1.pdf]

## Electronic Supplementary Information

### **A $\pi$ -extended benzothiadiazole derivative for high-efficiency TADF-sensitized fluorescent organic light-emitting diode**

Guang-Jin Shi,<sup>‡a</sup> Ke-Ke Tan,<sup>‡b</sup> Shu-Yang Liu,<sup>a</sup> Hao Zhang,<sup>a</sup> Hao-Ran Hu,<sup>a</sup> Kun-Peng  
Wang,<sup>a</sup> Liang-Zhong Xu,<sup>a</sup> Meng Li,<sup>\*b</sup> and Zhi-Qiang Hu<sup>\*a</sup>

<sup>a</sup>Key Laboratory of Optic-electric Sensing and Analytical Chemistry for Life Science,  
MOE, College of Chemistry and Molecular Engineering, Qingdao University of  
Science and Technology, Qingdao, 266042, China.

<sup>b</sup>Beijing National Laboratory for Molecular Sciences, CAS Key Laboratory of  
Molecular Recognition and Function, Institute of Chemistry, Chinese Academy of  
Sciences, Beijing 100190, China.

<sup>‡</sup>These authors contributed equally to this work.

Email: huzhiqiang@qust.edu.cn; limeng@iccas.ac.cn

## Contents

|                                                                                                 |           |
|-------------------------------------------------------------------------------------------------|-----------|
| <b>1. General information</b>                                                                   | <b>S1</b> |
| <b>2. Synthetic procedures and characterized data</b>                                           | <b>S2</b> |
| <b>3. Thermal properties</b>                                                                    | <b>S3</b> |
| <b>4. Theoretical calculations</b>                                                              | <b>S4</b> |
| <b>5. Electrochemical measurements</b>                                                          | <b>S4</b> |
| <b>6. Photophysical properties</b>                                                              | <b>S5</b> |
| <b>7. OLEDs performances</b>                                                                    | <b>S7</b> |
| <b>8. <math>^1\text{H}</math> NMR, <math>^{13}\text{C}</math> NMR and HRMS of new compounds</b> | <b>S8</b> |
| <b>9. References</b>                                                                            | <b>S9</b> |

## 1. General information

All reagents were purchased from commercial sources and used without further purification.  $^1\text{H}$  NMR and  $^{13}\text{C}$  NMR spectra were recorded on a Bruker DMX 500 MHz spectrometer. HRMS mass spectra were measured by Waters ACQUITY UPLC H-Class. Theoretical calculations were carried out with software package. Density functional theory (DFT) calculations were performed using the Gaussian 09 package at the B3LYP/6-31G(d) level. Multiwfn and VMD were used for data processing and rendering.<sup>[S1]</sup>

Absorption spectra were recorded on SHIMADZU UV-2600i spectrophotometer and fluorescence spectra were recorded on SHIMADZU RF-6000 spectrometer at room temperature. The transient PL decay characteristics, delayed PL emission spectra and absolute PLQY were measured on an Edinburgh Instruments FLS 980 spectrometer. Tetrahydrofuran solutions of **BTD-PAH** with a concentration of  $10^{-3}$  M were prepared as stock solutions. Dilute the stock solutions with toluene (PhMe), chloroform ( $\text{CHCl}_3$ ), tetrahydrofuran (THF), methyl alcohol (MeOH), dimethyl sulfoxide (DMSO) to the concentration of  $10^{-5}$   $\mu\text{M}$  for measuring absorption, emission spectra and fluorescence lifetime. The absorption wavelength ( $\lambda_{\text{abs}}$ ), emission wavelength ( $\lambda_{\text{em}}$ ), molar extinction coefficient ( $\epsilon$ ), Stokes shifts ( $\Delta\lambda$ ) were calculated by the measurement data. The fluorescent quantum yield in different solvents were calculated by standard compound (Rhodamine 101 as a standard), according to the following equation:  $\Phi_f = \Phi_{ST}(Grad_x/Grad_{ST})(\eta^2_x/\eta^2_{ST})$ . The subscripts *ST* and *X* denote is standard compound and test compound respectively,  $\Phi_f$  is the Relative fluorescent quantum yield, *Grad* is the gradient from the plot of integrated fluorescence intensity vs absorbance, and  $\eta$  is the refractive index of the solvent.

The OLED devices were fabricated by vacuum deposition onto pre-coated ITO glass substrates at a low pressure ( $1 \times 10^{-5}$  mbar) for organic and metal deposition successively, with deposition rate of  $0.5 \sim 3 \text{ \AA s}^{-1}$ . Before the fabrication of devices, the ITO glass substrates were cleaned with Decon 90, rinsed in ultrapure water and ethanol, dried in an oven at  $120 \text{ }^\circ\text{C}$ , then by plasma cleaning process. The electroluminescence and current-voltage-luminance characteristics of the devices

were measured with a computer-controlled Spectrascan PR 670 spectrophotometer and Keithley 2400 SourceMeter after device packaging.

## 2. Synthetic procedures and characterized data

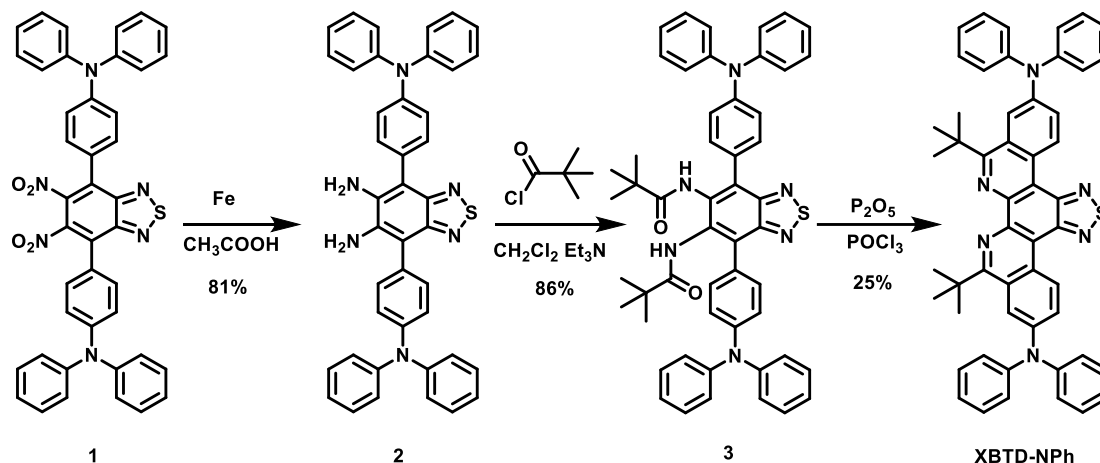

**Scheme S1.** Synthetic route of **XBTD-NPh**.

The synthetic methods of **1**, **2** and **3** were referred to the reported literature<sup>[S2]</sup>.

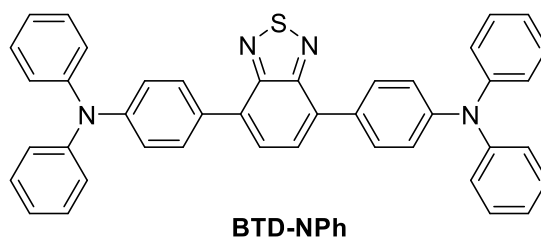

**Scheme S2.** Molecular structures of **BTD-NPh**.

The synthetic methods of **BTD-NPh** were referred to the reported literature<sup>[S3]</sup>.

### **4,7-bis(4-(diphenylamino)phenyl)benzo[*c*][1,2,5]thiadiazole-5,6-diamine (2)**

**1** (3.56 g, 5 mmol) and reduced iron powder (2.80 g, 50 mmol) were dissolved in 50 mL glacial acetic acid and stirred at 90 °C for 2 h until no **1** was detected by TLC. Added 50 mL water and stirring for another 1 h. After cooling to room temperature, filtered and dried to obtain brown solid **2** (2.64 g, 81%). Proceed directly to the next step without purification.

### ***N,N'*-(4,7-bis(4-(diphenylamino)phenyl)benzo[*c*][1,2,5]thiadiazole-5,6-diyl)bis(2,2-dimethylpropanamide) (3)**

**2** (1.30 g, 2 mmol) was dissolved in 20 mL of dichloromethane, added with triethylamine (0.81 g, 8 mmol), and stirred at 0 °C for 5 min. Pivaloyl chloride (0.48 g, 4 mmol) was slowly added dropwise and stirred for 8 h at room temperature until no **2** was detected by TLC. Removed solvents by rotary evaporator and purified by silica gel column chromatography (EA:PE = 1:8) and **3** was obtained as yellow solid (1.41 g, 86%). <sup>1</sup>H NMR (500 MHz, CDCl<sub>3</sub>) δ = 7.82 (s, 1H), 7.34 (d, *J* = 7.9 Hz, 2H), 7.20 (t, *J* = 7.3 Hz, 4H), 7.11 (dd, *J* = 23.1, 7.7 Hz, 6H), 6.98 (t, *J* = 6.8 Hz, 2H), 1.07 (s, 9H). <sup>13</sup>C NMR (125 MHz, CDCl<sub>3</sub>) δ = 177.4, 153.3, 148.1, 147.5, 133.0, 131.0, 129.4, 129.1, 127.9, 124.9, 123.4, 122.9, 39.5, 27.5. HRMS: *m/z* [M+Na]<sup>+</sup> calcd for C<sub>52</sub>H<sub>48</sub>N<sub>6</sub>NaO<sub>2</sub>S<sup>+</sup>, theory: 843.3452, found: 843.3471.

**5,8-di-tert-butyl-N<sup>3</sup>,N<sup>3</sup>,N<sup>10</sup>,N<sup>10</sup>-tetraphenyldibenzo[*c,i*][1,2,5]thiadiazolo[3,4-*f*][1,10]phenanthroline-3,10-diamine (XBTD-NPh)**

**3** (820 mg, 1 mmol) was dissolved in 5 mL of phosphorus oxychloride and phosphorus pentoxide (1.41 g, 10 mmol), and reflux for 4 h under nitrogen protection. Cooled to room temperature and slowly added 40% aqueous sodium hydroxide solution until pH = 14. Filtered and purified by silica gel column chromatography (EA:PE = 1:12) and **XBTD-NPh** was obtained as orange solid (196 mg, 25%). <sup>1</sup>H NMR (500 MHz, CDCl<sub>3</sub>) δ = 10.34 (d, *J* = 9.3 Hz, 1H), 8.16 (d, *J* = 1.9 Hz, 1H), 7.77 (dd, *J* = 9.3, 2.0 Hz, 1H), 7.36 (t, *J* = 7.7 Hz, 4H), 7.30 – 7.23 (m, 4H), 7.14 (t, *J* = 7.2 Hz, 2H), 1.64 (s, 9H). <sup>13</sup>C NMR (126 MHz, CDCl<sub>3</sub>) δ = 168.3, 153.0, 147.1, 146.0, 141.3, 129.6, 129.2, 129.1, 126.7, 126.3, 125.4, 124.1, 118.2, 115.4, 40.9, 31.3. HRMS: *m/z* [M+H]<sup>+</sup> calcd for C<sub>52</sub>H<sub>45</sub>N<sub>6</sub>S<sup>+</sup>, theory: 785.3421, found: 785.3417.

### 3. Thermal properties

The thermal stability of **XBTD-NPh** was then investigated. Thermogravimetric analyses (TGA) were performed on a TA Instruments Q-50 with a heating rate of 10 °C min<sup>-1</sup> at N<sub>2</sub> atmosphere. Differential scanning calorimetry (DSC) curves were performed on Netzsch DSC 204F1 at a heating rate of 10 °C min<sup>-1</sup> at N<sub>2</sub> atmosphere. The result was shown as in Fig. S1.

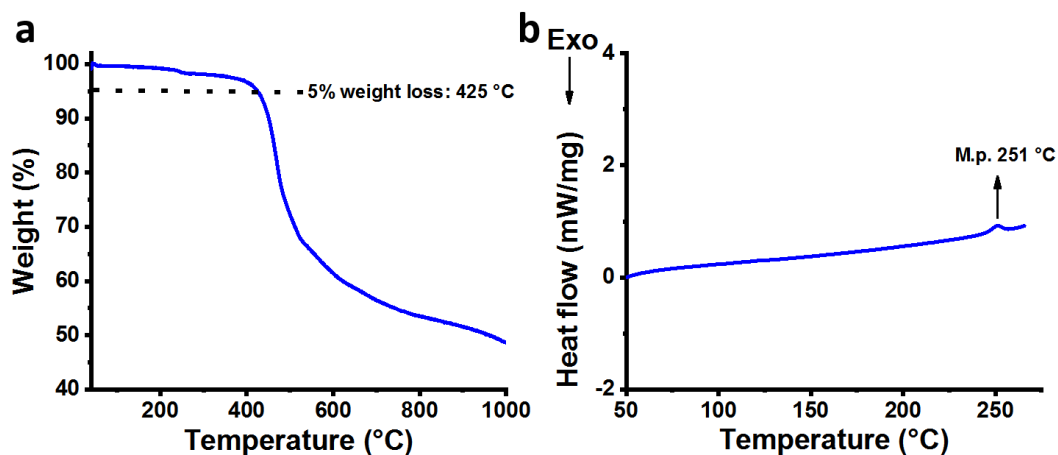

Fig. S1 (a) TGA and (b) DSC curve of XBTD-NPh.

#### 4. Theoretical calculations

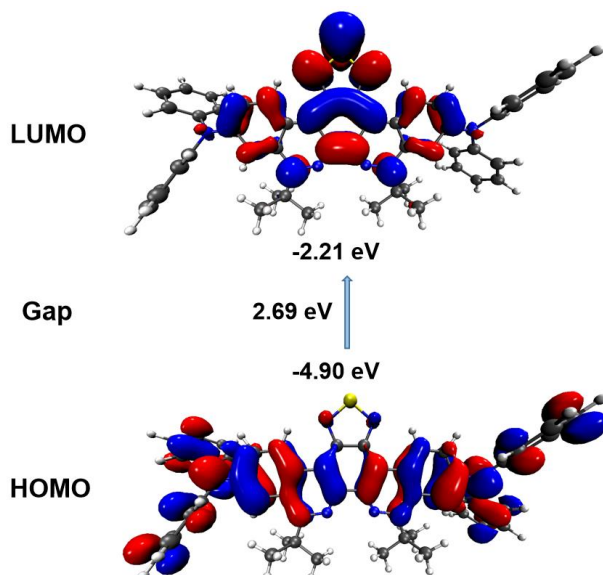

Fig. S2 HOMO/LUMO distributions and energy levels of XBTD-NPh.

#### 5. Electrochemical measurements

A conventional three electrode cell was used as electrolytic cell with a glassy carbon working electrode, an Ag/Ag<sup>+</sup> (0.01 M AgNO<sub>3</sub>) as the reference electrode, and Pt wire as the counter electrode. The oxidation potential was measured in CH<sub>2</sub>Cl<sub>2</sub> with 0.1 M of tetra-nbutylammonium hexafluorophosphate (*n*-Bu<sub>4</sub>NPF<sub>6</sub>) as a supporting electrolyte. Ferrocene used as internal standard for calibrating the reference electrode.

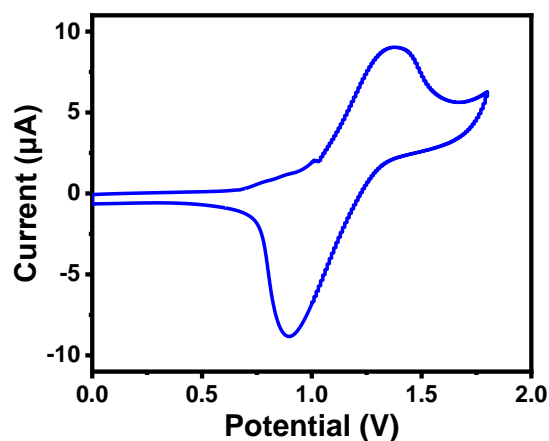

**Fig. S3** Cyclic voltammogram of XBTD-NPh

**Table S1.** Electrochemical properties of XBTD-NPh

| $E_{\text{ox,onset}}^a$ | $E_{\text{HOMO}}^b$ | $E_{\text{LUMO}}^c$ | $E_{\text{g,opt}}^d$ | $\lambda_{\text{onset}}^e$ |
|-------------------------|---------------------|---------------------|----------------------|----------------------------|
| 0.99 eV                 | -5.64 eV            | -3.21 eV            | 2.43 eV              | 510 nm                     |

<sup>a</sup>The onset of oxidation curve; <sup>b</sup> $E_{\text{HOMO}} = -[E_{\text{ox}} - E_{(\text{Fc}/\text{Fc}^+)} + 4.8]$  eV; <sup>c</sup> $E_{\text{LUMO}} = E_{\text{HOMO}} + E_{\text{g,opt}}$ ; <sup>d</sup>energy gap ( $E_{\text{g,opt}} = 1240 / \lambda_{\text{onset}}$ ); <sup>e</sup>energy gap ( $E_{\text{g,opt}} = 1240 / \lambda_{\text{onset}}$ ); <sup>e</sup>the onset of the absorption spectrum.

## 6. Photophysical properties

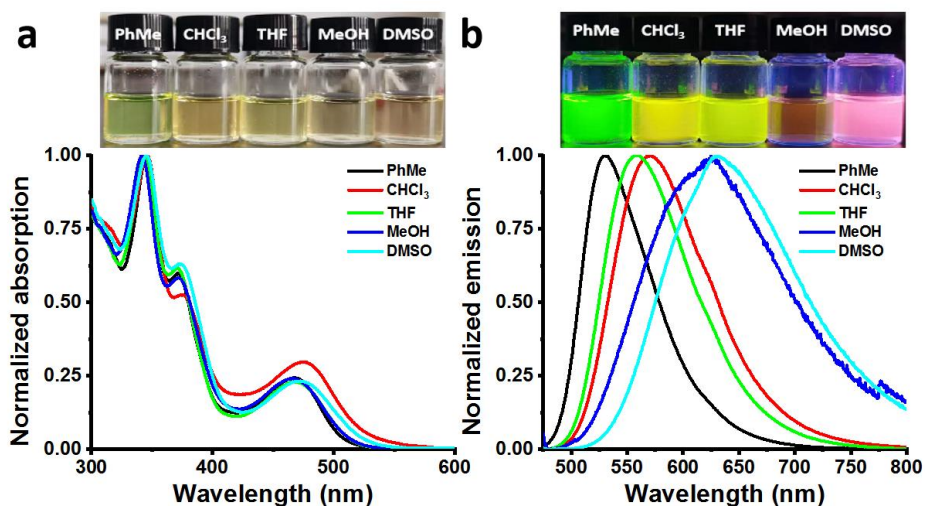

**Fig. S4** (a) UV-Vis absorption and (b) emission spectra of XBTD-NPh ( $\lambda_{\text{ex}} = 470$  nm) in different solutions ( $c = 1 \times 10^{-5}$  M).

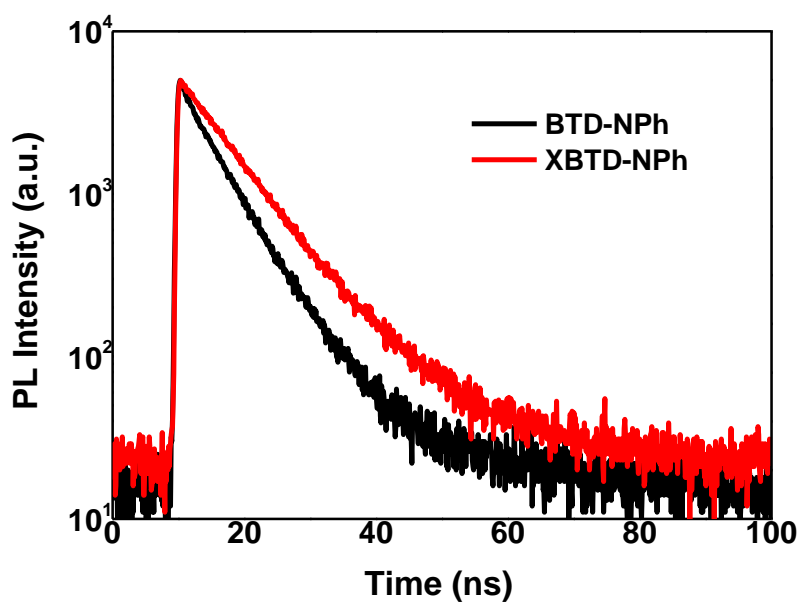

**Fig. S5** Transient PL decay of **BTD-NPh** and **XBTD-NPh** in toluene ( $c = 1 \times 10^{-5}$  M) at room temperature.

**Table S2.** Photophysical properties of **XBTD-NPh** in different solvents

| solvents <sup>a</sup> | $\lambda_{\text{abs,max}}$<br>(nm) | $\lambda_{\text{em}}$<br>(nm) | $\Delta\lambda^b$<br>(nm) | $\epsilon$<br>( $10^4 \text{ M}^{-1} \text{ cm}^{-1}$ ) | $\Phi_f^c$<br>(%) | $\tau_f$<br>(ns) |
|-----------------------|------------------------------------|-------------------------------|---------------------------|---------------------------------------------------------|-------------------|------------------|
| PhMe                  | 468                                | 531                           | 63                        | 0.9                                                     | 98                | 9.1              |
| CHCl <sub>3</sub>     | 475                                | 571                           | 96                        | 1.1                                                     | 67                |                  |
| THF                   | 468                                | 560                           | 92                        | 0.8                                                     | 87                |                  |
| MeOH                  | 469                                | 630                           | 161                       | 0.9                                                     | 3                 |                  |
| DMSO                  | 470                                | 631                           | 161                       | 0.8                                                     | 21                |                  |

<sup>a</sup>Measured at room temperature ( $c = 1 \times 10^{-5}$  M); <sup>b</sup> $\Delta\lambda = \lambda_{\text{em}} - \lambda_{\text{abs,max}}$ ; <sup>c</sup>Rhodamine 101 as a standard (excited at 450 nm,  $\Phi_f = 0.96$  in ethanol)<sup>[S4]</sup>.



## 7. OLEDs performances

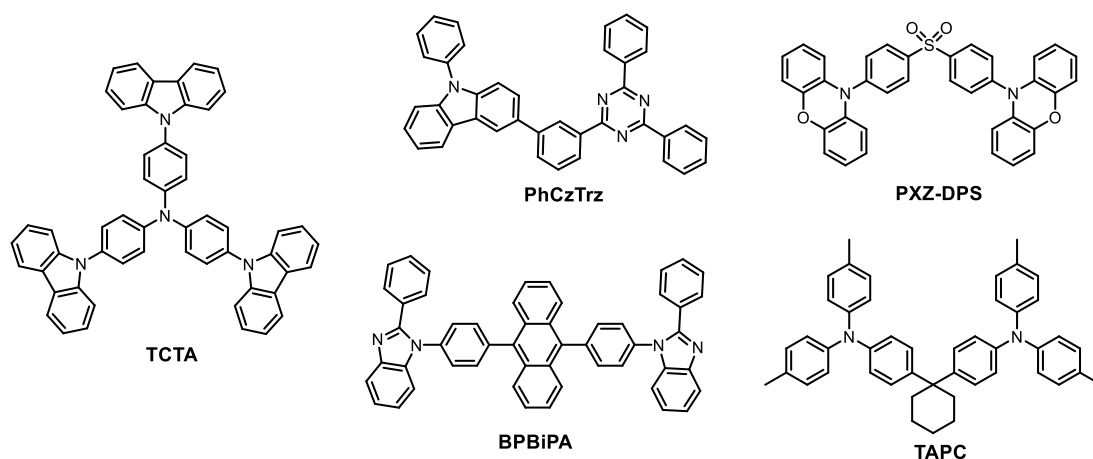

**Fig. S6** The molecular structures of the compounds used in the device.

The CP-OLEDs had the structure: Glass/ITO/ TAPC (40 nm)/ TCTA (10 nm)/PhCzTrz : 10 wt% PXZ-DPS : 1.0 wt% **XBTD-NPh** (20 nm)/BPBiPA (40 nm) LiF (0.5 nm)/Al (150 nm). In which, ITO is indium tin oxide, 1,1-bis[4-[N,N-di(*p*-tolyl)-amino]phenyl]cyclohexane (TAPC) was used as hole-transporting layer, 4,4',4''-Tris(carbazol-9-yl)-triphenylamine (TCTA) was acted as electron-blocking layer, 3-(3-(4,6-diphenyl-1,3,5-triazin-2-yl)phenyl)-9-phenyl-9*H*-carbazole (PhCzTrz) was employed as host material, 10,10'-(sulfonylbis(4,1-phenylene))bis(10*H*-phenoxazine) (PXZ-DPS) was served as TADF sensitizer, 1.0 wt% **XBTD-NPh** was co-deposited with PhCzTrz and 10 wt% PXZ-DPS to serve as the emitting layer, 9,10-bis(4-(2-phenyl-1*H*-benzo[*d*]imidazol-1-yl)phenyl)anthracene (BPBiPA) was used as electron-transporting layer, LiF and Al acted as electron-transporting layer, electron-injection layer and the cathode, respectively.

## 8. $^1\text{H}$ NMR, $^{13}\text{C}$ NMR and HRMS of new compounds

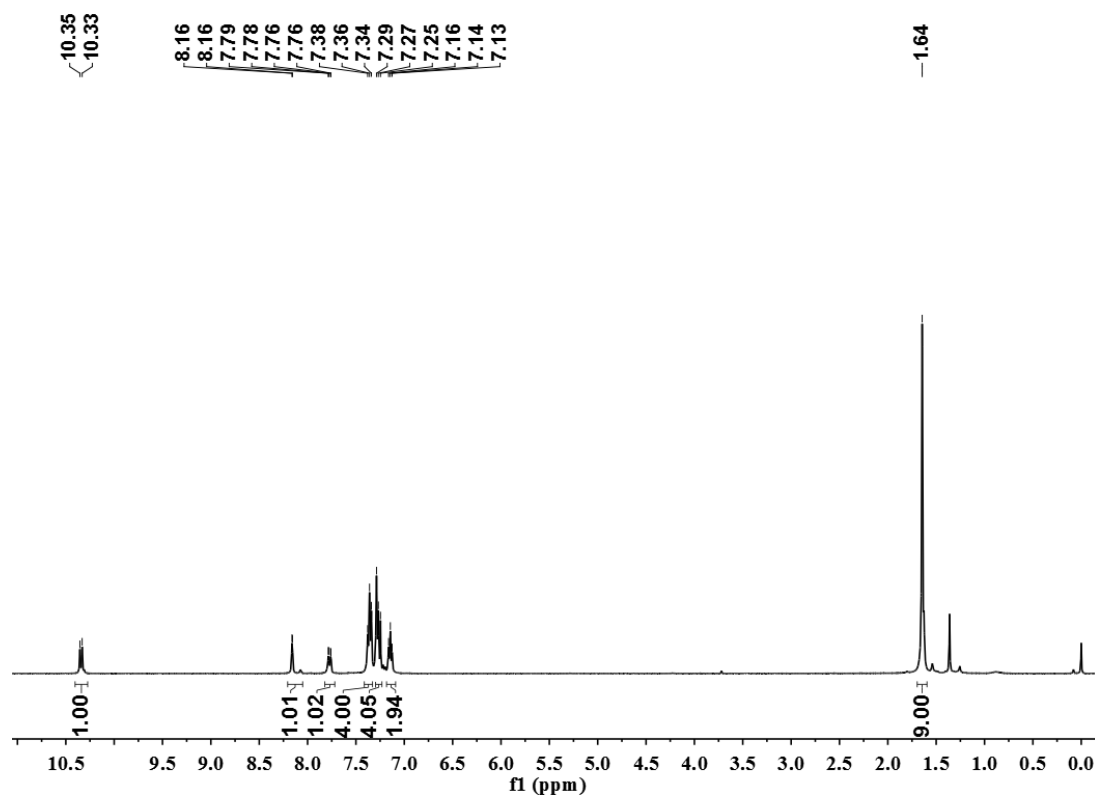

Fig. S7  $^1\text{H}$  NMR spectrum (500 MHz,  $\text{CDCl}_3$ ) of XBTD-NPh.

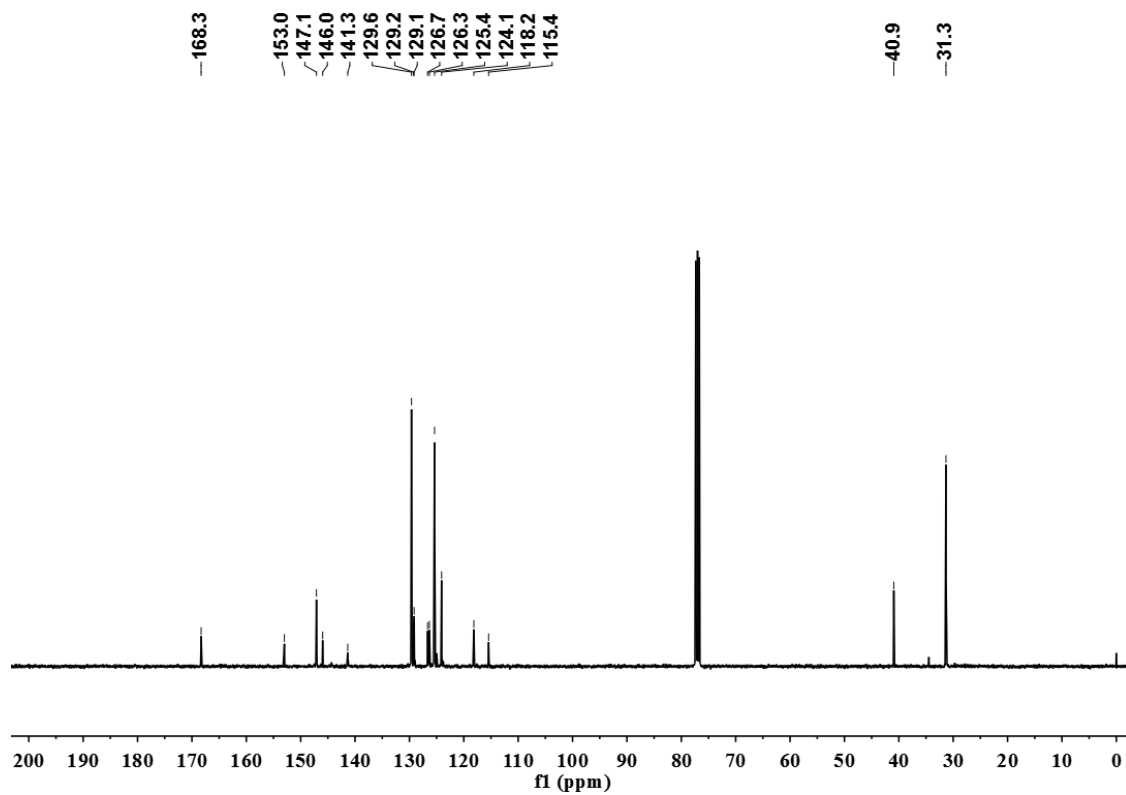

Fig. S8  $^{13}\text{C}$  NMR spectrum (126 MHz,  $\text{CDCl}_3$ ) of XBTD-NPh.

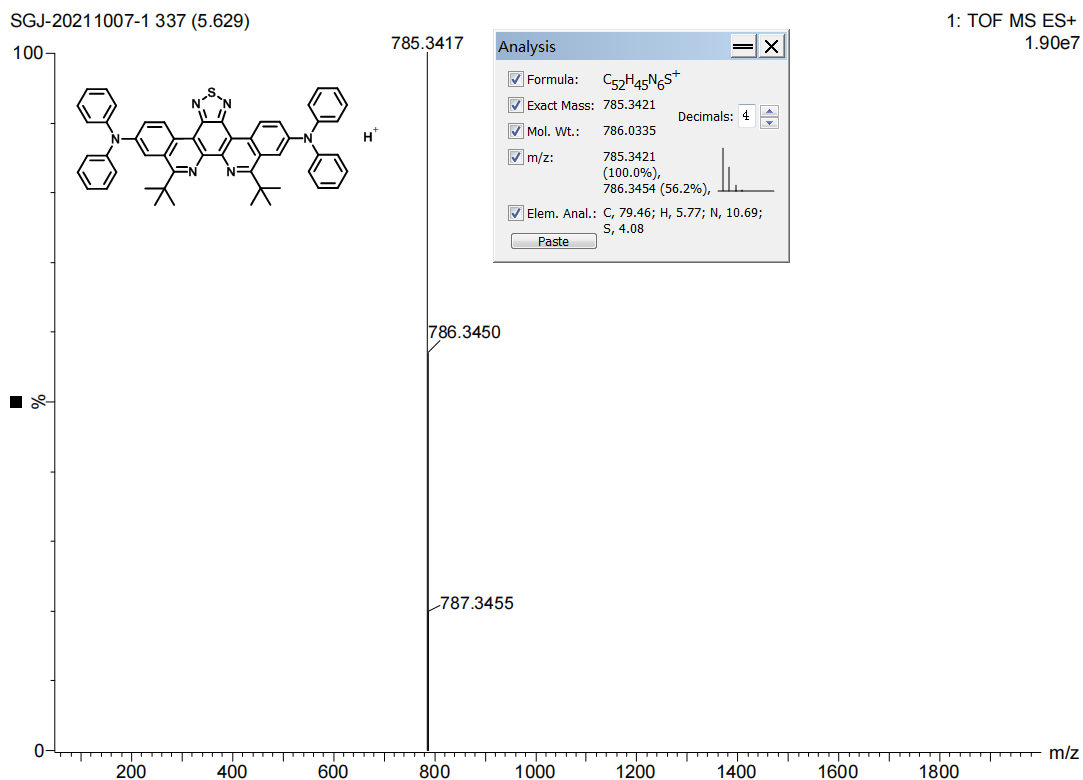

**Fig. S9** HRMS of XBTD-NPh.

## 9. References

- [S1] (a) T. Lu, and F. Chen, *J. Comput. Chem.* 2012, **33**, 580; (b) W. Humphrey, A. Dalke, and K. Schulten, *J Molec Graphics* 1996, **14**, 33.
- [S2] G.-J. Shi, Y.-D. Wang, Z.-X. Yu, Q. Zhang, S. Chen, L.-Z. Xu, K.-P. Wang and Z.-Q. Hu, *Dye. Pigment.*, 2022, **204**, 110471.
- [S3] W. Fu, H. Chen, Y. Han, W. Wang, R. Zhang and J Liu, *New J. Chem.*, 2021, **45**, 19082.
- [S4] R. F. Kubin and A. N. Fletcher, *J. Lumin.*, 1982, **27**, 455.
